# Supplementary material for: Regulatory Dynamics of Cell Differentiation Revealed by True Time Series From Multinucleate Single Cells
Source: Frontiers journal article supplement (doi:10.3389/fgene.2020.612256), 2021-01-08
Supplement: Data_Sheet_1.ZIP [file Data_Sheet_1.ZIP]

## Sheet: Blatt 1 - Tabelle 2
Fragment Nr	Custom_Nr	Gene
1	17	ribA
2	7	nhpA
3	18	pksA
4	33	ligA
5	6	ralA
6	22	damA
7	27	ehdA
8	8	pumA
9	30	pakA
10	29	cdcA
11	10	ardA
12	12	hstA
13	1	psgA
14	3	pptB
15	24	tspA
16	19	dspA
17	5	pikB
18	14	uchA
19	31	gapA
20	11	meiB
21	13	pcnA
22	20	ribB
23	23	arpA
24	25	rasA
25	32	pldA
26	9	anxA
27	26	pptA
28	34	pwiA
29	15	cudA
30	2	pldC
31	16	pikC
32	4	pldB
33	28	spiA
34	21	hcpA
35	35	rgsA
