# Supplementary material for: Regulatory Dynamics of Cell Differentiation Revealed by True Time Series From Multinucleate Single Cells
Source: Frontiers journal article supplement (doi:10.3389/fgene.2020.612256), 2021-01-08
Supplement: Data_Sheet_1.ZIP [file Data_Sheet_1.ZIP]

## Computation of T-Invariants with Charlie

T-invariants of Petri nets can be computed with Charlie and visualized in Snoopy. Snoopy and Charlie are platform-independent tools that are freely available for download at Monika Heiner's website:

### **Snoopy download:**

<https://www-dssz.informatik.tu-cottbus.de/DSSZ/Software/Snoopy>

### **Charlie download:**

<https://www-dssz.informatik.tu-cottbus.de/DSSZ/Software/Charlie>

A short video tutorial which demonstrates the computation of T-invariants with Charlie is available as Movie 1 in the supplementary data to Werthmann, B. and W. Marwan (2017): *J. Phys. D: Appl. Phys.* **50**, 464003

<https://iopscience.iop.org/article/10.1088/1361-6463/aa8e2b>
